# Supplementary material for: FeS colloids – formation and mobilization pathways in natural waters
Source: Royal Society of Chemistry journal article supplement (doi:10.1039/c9en01427f), 2020-01-01
Supplement: c9en01427f1.pdf [file c9en01427f1.pdf]

## **FeS Colloids – Formation and Mobilization Pathways in Natural Waters**

**Vincent Noël<sup>a,\*</sup>, Naresh Kumar<sup>b,c,d</sup>, Kristin Boye<sup>a</sup>, Lilia Barragan<sup>a</sup>, Juan  
Lezama-Pacheco<sup>e</sup>, Rosalie Chuf<sup>f</sup>, Nikola Tolic<sup>f</sup>, Gordon E. Brown Jr.<sup>a,b,d</sup>, John R.  
Bargar<sup>a</sup>**

<sup>a</sup> *Stanford Synchrotron Radiation Lightsource, SLAC National Accelerator Laboratory,  
2575 Sand Hill Road, Menlo Park, CA 94025, USA*

<sup>b</sup> *Department of Geological Sciences, School of Earth, Energy & Environmental Sciences,  
Stanford University, Stanford, CA 94305-2115, USA*

<sup>c</sup> *Department of Environmental Geosciences, Centre for Microbiology and Environmental  
Systems Science, University of Vienna, 1090 Vienna, AUSTRIA*

<sup>d</sup> *Center for Environmental Implications of NanoTechnology (CEINT), Duke University,  
P.O. Box 90287, Durham, NC 27708-0287, USA*

<sup>e</sup> *Department of Earth System Science, Stanford University, Stanford, CA 94305, USA*

<sup>f</sup> *Environmental Molecular Sciences Laboratory, Pacific Northwest National Laboratory,  
Richland, WA 99354, USA*

to be submitted to

*Environmental Science Nano*

\*Corresponding author: Vincent Noël; e-mail: [noel@slac.stanford.edu](mailto:noel@slac.stanford.edu)

**1) ADDITIONAL METHODOLOGY**

**2) CHARACTERIZATION OF SOURCE OF NATURAL ORGANIC CARBON**

**3) SELECTION OF THE CONCENTRATION OF ORGANIC COMPOUNDS  
RELATIVE TO FERRIHYDRITE**

**4) F<sub>E</sub> OXIDATION STATE AND SPECIATION OF THE AQUEOUS  
FRACTION**

**5) CHEMICAL COMPOSITION OF ARTIFICIAL GROUNDWATERS**

## 1) ADDITIONAL METHODOLOGY

**FT-ICR-MS analyses.** The chemical composition of natural organic carbon (NOC), water extractable organic carbon from grass collected at a DOE-managed former U ore processing facility at Riverton (Figure SI-1), water-soluble organic C was examined using a 12 Tesla Bruker Solarix Fourier-transform ion-cyclotron-resonance mass spectrometer (FT-ICR-MS) at the Environmental Molecular Sciences Laboratory (EMSL) based in Pacific Northwest National Laboratory. Extracts were diluted 50:50 (v/v) with LC-MS grade methanol less than 30 min before analysis to minimize potential esterification. Samples were injected directly into the mass spectrometer and the ion accumulation time was optimized for all samples.

A standard Bruker electrospray ionization (ESI) source was used to generate negatively charged molecular ions. Samples were introduced to the ESI source equipped with a fused silica tube (30  $\mu\text{m}$  i.d.) through an Agilent 1200 series pump (Agilent Technologies) at a flow rate of 3.0  $\mu\text{l min}^{-1}$ . Experimental settings followed previously established optimal parameterization: needle voltage +4.4 kV; Q1 set to  $m/z$  50; heated resistively coated glass capillary operated at 180°C. All samples were run with instrument settings optimized by tuning for the IHSS Suwannee River fulvic acid standard. The instrument was externally calibrated weekly with a tuning solution from Agilent, which calibrates to a mass accuracy of <0.1 ppm and contains the following compounds:  $\text{C}_2\text{F}_3\text{O}_2$ ,  $\text{C}_6\text{HF}_9\text{N}_3\text{O}$ ,  $\text{C}_{12}\text{HF}_{21}\text{N}_3\text{O}$ ,  $\text{C}_{20}\text{H}_{18}\text{F}_{27}\text{N}_3\text{O}_8\text{P}_3$ , and  $\text{C}_{26}\text{H}_{18}\text{F}_{39}\text{N}_3\text{O}_8\text{P}_3$  with an  $m/z$  range of 112–1,333. Forty-four individual scans were averaged for each sample, and they were internally calibrated using an organic matter homologous series separated by 14 Da ( $-\text{CH}_2$  groups). Mass measurement accuracy was typically within 1 ppm for singly charged ions across a broad  $m/z$  range (100–1,100). The mass resolution was  $\sim 350,000$  at  $m/z$  321. All observed ions in the spectra were singly charged, as confirmed by the 1.0034 Da spacing found between isotopic forms of the same molecule (between  $^{12}\text{C}_n$  and  $^{12}\text{C}_{n-1}^{13}\text{C}_1$ ). DataAnalysis software (BrukerDaltonik version 4.2) was used to convert raw spectra to a list of peak locations applying FTMS peak picker with the absolute intensity threshold set to the default value of 100. To further reduce cumulative errors, all sample peak lists within a dataset were aligned to each other prior to formula assignment to eliminate possible mass shifts that would impact formula assignment.

**Table SI-1.** pH measurements in experiments; Fh: ferrihydrite; PAA: Polyacrylic Acid; NOC: Natural Organic Carbon

| <b>Sulfide/Fe ratio</b> | <b>Fh</b> | <b>Fh-PAA</b> | <b>Fh-NOC</b> |
|-------------------------|-----------|---------------|---------------|
| <b>0.05</b>             | 6.89      | 6.91          | 6.98          |
|                         | 7.24      | 7.24          | 7.21          |
| <b>0.1</b>              | 6.93      | 6.94          | 7.04          |
|                         | 7.28      | 7.26          | 7.18          |
| <b>0.5</b>              | 7.03      | 7.06          | 7.08          |
|                         | 7.39      | 7.39          | 7.29          |
| <b>2</b>                | 7.13      | 7.11          | 7.15          |
|                         | 7.41      | 7.43          | 7.33          |

Initial; Final (336h after sulfidation was induced)

## 2) CHARACTERIZATION OF SOURCE OF NATURAL ORGANIC CARBON

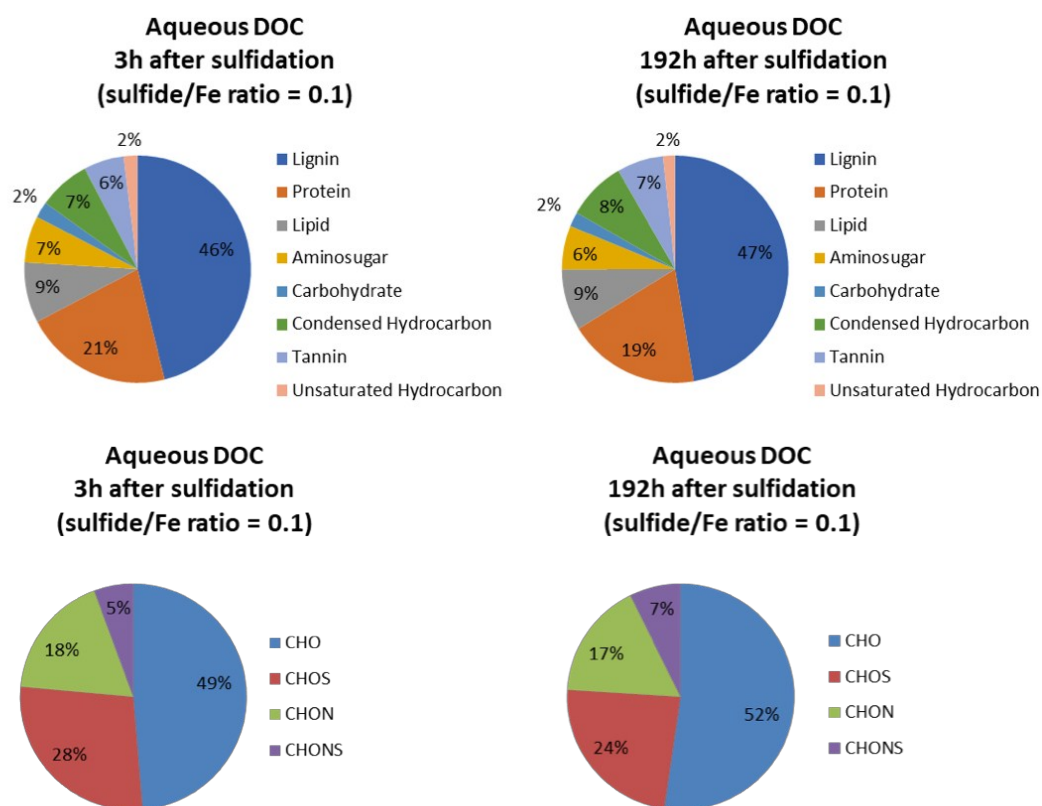

**Figure SI-1.** Relative distribution (%) of molecular class (top) and elemental formula (bottom) of organic compounds into the aqueous fraction from sulfidation of Fh-NOC (see §1) after the 3 first hours (left) and 192 first hours (right) of sulfidation was induced.

### 3) SELECTION OF THE CONCENTRATION OF ORGANIC COMPOUNDS RELATIVE TO FERRIHYDRITE

Kumar *et al.*<sup>1</sup> have previously shown differences in reactivity of Fe(III)-(oxyhydr)oxide nanoparticles with dissolved sulfides depending on the surface area and the degree of crystallinity of Fe(III)-(oxyhydr)oxide nanoparticles. Similarly, different Fe(III)-(oxyhydr)oxide nanoparticles could generate different colloids. The generation of Fe-colloids from sulfidation of goethite (Fe(III)O(OH)), other Fe(III)-(oxyhydr)oxide that is redox-sensitive and ubiquitous in surface and near-surface environments, will be compared with that of Fh sulfidation in an upcoming publication. To be consistent in our experimental approach, almost identical concentration of C was sorbed on to the fixed mass of Fe(III)-(oxyhydr)oxide nanoparticles. To determine the appropriate concentration of C to be sorbed, a series of batch tests were performed using varying concentrations of PAA for a 200 mg mass of Fh or goethite. (Figure SI-2). The maximum sorption of PAA is completed for 2115 mg/L of PAA added in a solution of 200mg of goethite (Figure SI-2a). Subsequently, 2115 mg/L of PAA have been added in a solution of 200mg of Fh, resulting in the sorption of the totality of PAA (Figure SI-2b). Thus, a ratio of 2115 mg C per 200g Fh, *i.e.* 10.6 (~11) mg C per g Fh was chosen for PAA.

Based on these batch experiments, we added 2115 mg/L of PAA to ferrihydrite to be able to have ~900 mg/L of PAA sorbed on 200 mg of ferrihydrite or goethite. the Fe(III)-(oxyhydr)oxides providing approx. ~200 mg C per gram of Fe(III)-(oxyhydr)oxide.

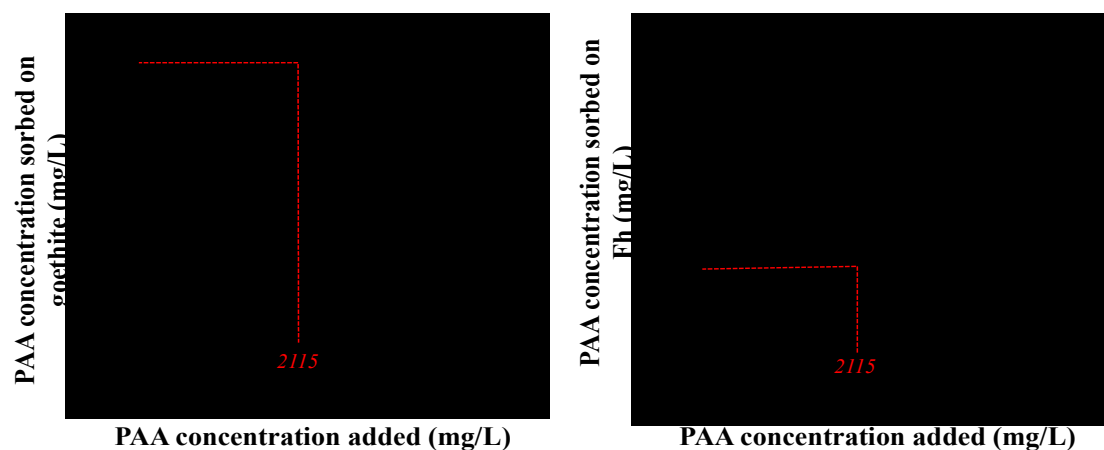

**Figure SI-2.** Sorbed dissolved organic carbon concentration in presence of 200mg of goethite (left) and ferrihydrite (right) as a function of added dissolved organic carbon concentration.

#### 4) $F_E$ OXIDATION STATE AND SPECIATION OF THE AQUEOUS FRACTION

##### 4.1 Aqueous Fe(III) colorimetric analyzes

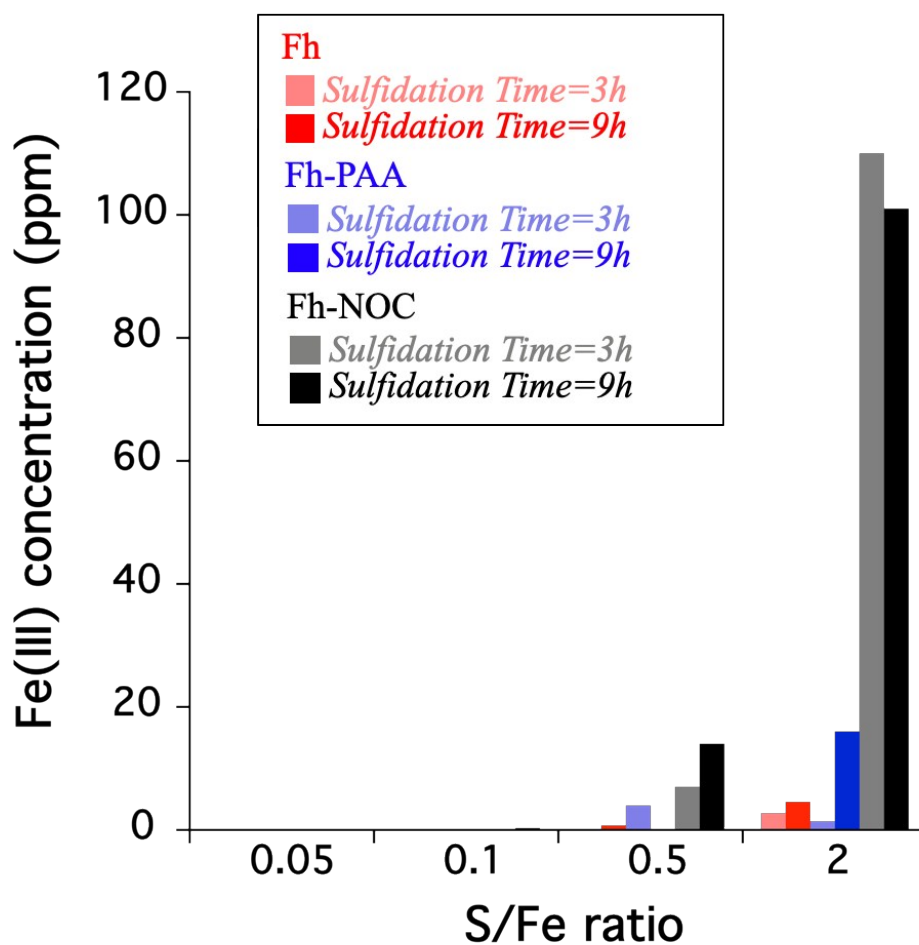

**Figure SI-3.** Dissolved Fe(III) concentration measured during sulfidation reactions of Fh, after 3 and 9h of reaction, as a function of different Sulfide/Fe ratios.

## 4.2 Fe speciation spectroscopic analysis

**Table SI-2.** Results of the Principal Component Analysis (PCA) of 12 bulk EXAFS spectra of the aqueous fraction (< 20 nm) collected after 3h, 24h, 48h, and 120h of Fh sulfidation in the presence and absence of organic compounds (PAA or natural organic carbon).

| Component | Eigenvalue | Variance | Cum Var <sup>a</sup> |
|-----------|------------|----------|----------------------|
| 1         | 6.984109   | 0.997730 | 0.997730             |
| 2         | 0.007763   | 0.001109 | 0.998839             |
| 3         | 0.003264   | 0.000466 | 0.999305             |
| 4         | 0.002119   | 0.000303 | 0.999608             |
| 5         | 0.001852   | 0.000265 | 0.999872             |
| 6         | 0.000585   | 0.000084 | 0.999956             |
| 7         | 0.000309   | 0.000044 | 1                    |

<sup>a</sup> Cumulative variance

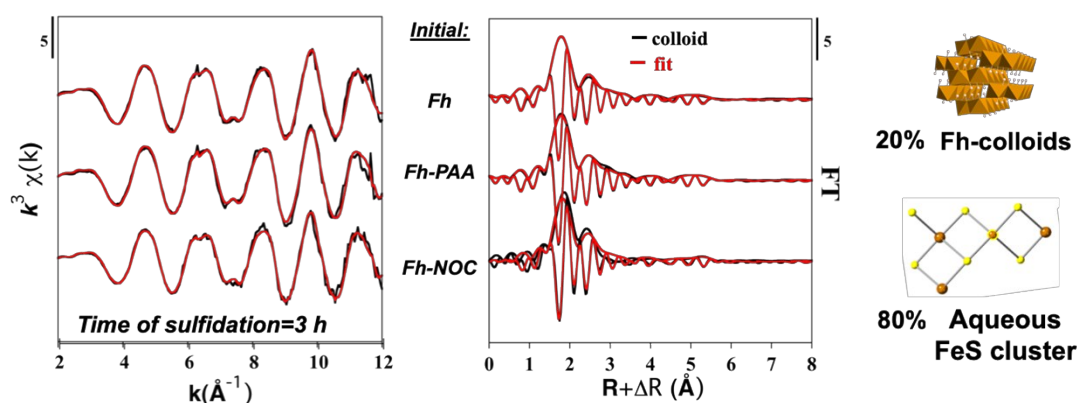

| Sample                         | Fh <sup>1</sup> | Aqueous FeS cluster from Fh sulfidation reaction (120h) | Rf* (10 <sup>-2</sup> ) |
|--------------------------------|-----------------|---------------------------------------------------------|-------------------------|
| Fh after 3h of sulfidation     | 14              | 86                                                      | 2.75                    |
| Fh-PAA after 3h of sulfidation | 25              | 75                                                      | 3.34                    |
| Fh-NOC after 3h of sulfidation | 20              | 80                                                      | 2.25                    |

\*Calculated as  $\Sigma(k^3\chi_{\text{exp}} - k^3\chi_{\text{fit}})^2 / \Sigma(k^3\chi_{\text{exp}})^2$

**Figure SI-4.** Molecular characterization of Fe in the aqueous fraction (< 20nm) from sulfidation of Fh, Fh-PAA, and Fh-NOC composites, at a sulfide/Fe ratio of 0.5 in a 0.1M NaCl-solution. Linear combination-least squares fitting of the EXAFS spectrum of the aqueous fraction collected 3 hours after sulfidation was initiated. The fits were performed using a Fh reference spectrum and the spectrum from Fe-colloids collected



after 120 hours of sulfidation reaction. The values of these best LC-LS fits normalized at 100% are reported in the table of the bottom.

**Table SI-3.** Results of shell-by-shell fitting of the EXAFS spectrum of Fh after sulfidation for 120 hours at a sulfide/Fe ratio of 0.5 in a 0.1M NaCl-solution.

|                 |                              |           |
|-----------------|------------------------------|-----------|
|                 | N                            | 4**       |
| Fe-S1           | D (Å)                        | 2.24(3)   |
|                 | $\sigma^2$ (Å <sup>2</sup> ) | 0.0020(3) |
|                 |                              | 1.8±0.3   |
| Fe-Fe1          |                              | 2.74(5)   |
|                 |                              | 0.0027(3) |
|                 |                              | 1.0±0.5   |
| Fe-Fe2          |                              | 3.84(30)  |
|                 |                              | 0.0047(6) |
|                 |                              | 2.3±1.2   |
| Fe-S2           |                              | 4.46(50)  |
|                 |                              | 0.01**    |
|                 |                              | 1.8±0.3   |
| Fe-S-Fe<br>(MS) |                              | 5.48(4)   |
|                 |                              | 0.0055(6) |

\*S02=0.79±-0.03 \*\*Denotes a fixed value

## 5) CHEMICAL COMPOSITION OF ARTIFICIAL GROUNDWATERS

Table SI-4. Chemical composition of artificial waters

| Constituent                   | Alpine River<br>(Composition<br>of the Rhine<br>River as it<br>leaves the<br>Alps) <sup>1</sup> | Alluvial<br>groundwater,<br>crested butte,<br>CO ( <i>personal<br/>communication</i> ) | Alluvial<br>groundwater<br>Riverton,<br>WY <sup>2</sup> | Seawater <sup>3</sup> |
|-------------------------------|-------------------------------------------------------------------------------------------------|----------------------------------------------------------------------------------------|---------------------------------------------------------|-----------------------|
| pH                            | 7.02                                                                                            | 7.3                                                                                    | 7.5                                                     | 7.1                   |
|                               | mM                                                                                              | mM                                                                                     | mM                                                      | mM                    |
| Ca                            | 1.01                                                                                            | 3.59                                                                                   | 3.7                                                     | 10                    |
| Na                            | 2.5                                                                                             | 1.17                                                                                   | 10.4                                                    | 469                   |
| Mg                            | 0.29                                                                                            | 2.26                                                                                   | 18.5                                                    | 52.8                  |
| Mn                            | -                                                                                               | -                                                                                      | 0.03                                                    | -                     |
| K                             | 0.03                                                                                            | 9.72                                                                                   | 0.5                                                     | 10                    |
| Si                            | 0.13                                                                                            | 0.78                                                                                   | 0.3                                                     | -                     |
| Fe                            | -                                                                                               | -                                                                                      | 0.009                                                   | -                     |
| Cl <sup>-</sup>               | 0.03                                                                                            | 1.49                                                                                   | 16.9                                                    | 546                   |
| SO <sub>4</sub> <sup>2-</sup> | 0.36                                                                                            | 0.62                                                                                   | 62.5                                                    | 28.2                  |
| Bicarbonate                   | 1.87                                                                                            | 10.20                                                                                  |                                                         |                       |

## REFERENCES

1. Drever, J.I. *The Geochemistry of Natural Waters: Surface and Groundwater Environments*, 3rd ed. Englewood Cliffs, NJ: Prentice Hall, 1997.
2. N., Kumar, J.S., Lezama-Pacheco, V., Noël, G., Dublet, G.E., Brown Jr., Sulfidation mechanisms of Fe(III)-(oxyhydr)oxide nanoparticles: A spectroscopic study. *Environ. Sci. Nano.* **2018**, 5, 1012-1026.
3. DOE (1994). In A. G. Dickson & C. Goyet (eds.). Handbook of methods for the analysis of the various parameters of the carbon dioxide system in sea water. 2. ORNL/CDIAC-74.
